# Bovine Papillomavirus Type 2 (BPV-2) E5 Oncoprotein Binds to the Subunit D of the $V_1$ -ATPase Proton Pump in Naturally Occurring Urothelial Tumors of the Urinary Bladder of Cattle

Sante Roperto<sup>1\*</sup>, Valeria Russo<sup>2</sup>, Giuseppe Borzacchiello<sup>2</sup>, Chiara Urraro<sup>2</sup>, Roberta Lucà<sup>2</sup>, Iolanda Esposito<sup>2</sup>, Marita Georgia Riccardi<sup>2</sup>, Cinzia Raso<sup>2‡</sup>, Marco Gaspari<sup>3</sup>, Dora Maria Ceccarelli<sup>2</sup>, Rocco Galasso<sup>4</sup>, Franco Roperto<sup>5</sup>

**1** Dipartimento di Medicina Veterinaria e Produzioni Animali, Settore Malattie Infettive, Università di Napoli Federico II, Napoli, Italia, **2** Dipartimento di Medicina Veterinaria e Produzioni Animali, Settore Patologia Generale, Università di Napoli Federico II, Napoli, Italia, **3** Dipartimento di Medicina Clinica e Sperimentale, Università di Catanzaro "Magna Graecia", Catanzaro, Italia, **4** Unit of clinical epidemiology, biostatistic and cancer registry, IRCCS CROB, Rionero in Vulture (Potenza), Italia, **5** Dipartimento di Biologia, Università di Napoli Federico II, Napoli, Italia

## Abstract

**Background:** Active infection by bovine papillomavirus type 2 (BPV-2) was documented for fifteen urinary bladder tumors in cattle. Two were diagnosed as papillary urothelial neoplasm of low malignant potential (PUNLMP), nine as papillary and four as invasive urothelial cancers.

**Methods and Findings:** In all cancer samples, PCR analysis revealed a BPV-2-specific 503 bp DNA fragment. E5 protein, the major oncoprotein of the virus, was shown both by immunoprecipitation and immunohistochemical analysis. E5 was found to bind to the activated (phosphorylated) form of the platelet derived growth factor  $\beta$  receptor. PDGF $\beta$ R immunoprecipitation from bladder tumor samples and from normal bladder tissue used as control revealed a protein band which was present in the pull-down from bladder cancer samples only. The protein was identified with mass spectrometry as "V<sub>1</sub>-ATPase subunit D", a component of the central stalk of the V<sub>1</sub>-ATPase vacuolar pump. The subunit D was confirmed in this complex by coimmunoprecipitation investigations and it was found to colocalize with the receptor. The subunit D was also shown to be overexpressed by Western blot, RT-PCR and immunofluorescence analyses. Immunoprecipitation and immunofluorescence also revealed that E5 oncoprotein was bound to the subunit D.

**Conclusion:** For the first time, a tri-component complex composed of E5/PDGFR/subunit D has been documented in vivo. Previous in vitro studies have shown that the BPV-2 E5 oncoprotein binds to the proteolipid c ring of the V<sub>0</sub>-ATPase sector. We suggest that the E5/PDGFR/subunit D complex may perturb proteostasis, organelle and cytosol homeostasis, which can result in altered protein degradation and in autophagic responses.

**Citation:** Roperto S, Russo V, Borzacchiello G, Urraro C, Lucà R, et al. (2014) Bovine Papillomavirus Type 2 (BPV-2) E5 Oncoprotein Binds to the Subunit D of the V<sub>1</sub>-ATPase Proton Pump in Naturally Occurring Urothelial Tumors of the Urinary Bladder of Cattle. PLoS ONE 9(2): e88860. doi:10.1371/journal.pone.0088860

**Editor:** Zhi-Ming Zheng, National Institute of Health - National Cancer Institute, United States of America

**Received:** November 5, 2013; **Accepted:** January 10, 2014; **Published:** February 24, 2014

**Copyright:** © 2014 Roperto et al. This is an open-access article distributed under the terms of the Creative Commons Attribution License, which permits unrestricted use, distribution, and reproduction in any medium, provided the original author and source are credited.

**Funding:** This work was sponsored by grants from the Ministero Italiano dell'Università e della Ricerca Scientifica (MIUR), Ministero Italiano delle Politiche Agricole, Agroalimentari e Forestali (MIPAAF) and Assessorato alla Sanità della Regione Basilicata. The funders had no role in study design, data collection and analysis, decision to publish, or preparation of the manuscript.

**Competing Interests:** The authors have declared that no competing interests exist.

\* E-mail: sante.roperto@unina.it

‡ Current address: Systems Biology Ireland, University College Dublin, Belfield, Dublin, Republic of Ireland

## Introduction

Urinary bladder tumors are very rare in cattle, representing approximately 0.01% of all bovine malignancies [1]. However, these tumors occur endemically in adult cattle reared in hilly/mountain pasturelands rich in bracken fern (*Pteridium* spp.) [2–4]. The fern contains immunosuppressive, mutagenic, clastogenic and carcinogenic chemicals; therefore, it is believed to be the only higher plant naturally causing cancer in animals [5]. It has been suggested that toxic substances of fern have an important synergistic role in concert with infectious agents in bovine urinary

bladder carcinogenesis [6,7]. Furthermore, bovine papillomavirus type 2 (BPV-2) has a crucial role in bovine bladder carcinogenesis; BPV-2 DNA was found in 80% of naturally occurring cancers of the urinary bladder in cattle [4,8–11]. Indeed, BPV-2 appears to be the most important infectious agent involved in bovine and bubaline urinary bladder carcinogenesis [9,10,12–13].

It has been suggested that BPV-2, a closely related serotype to BPV-1 [19], causes a latent infection of the urothelium, which can be activated by the chemical carcinogens of bracken fern ultimately resulting in bladder cancer [7].

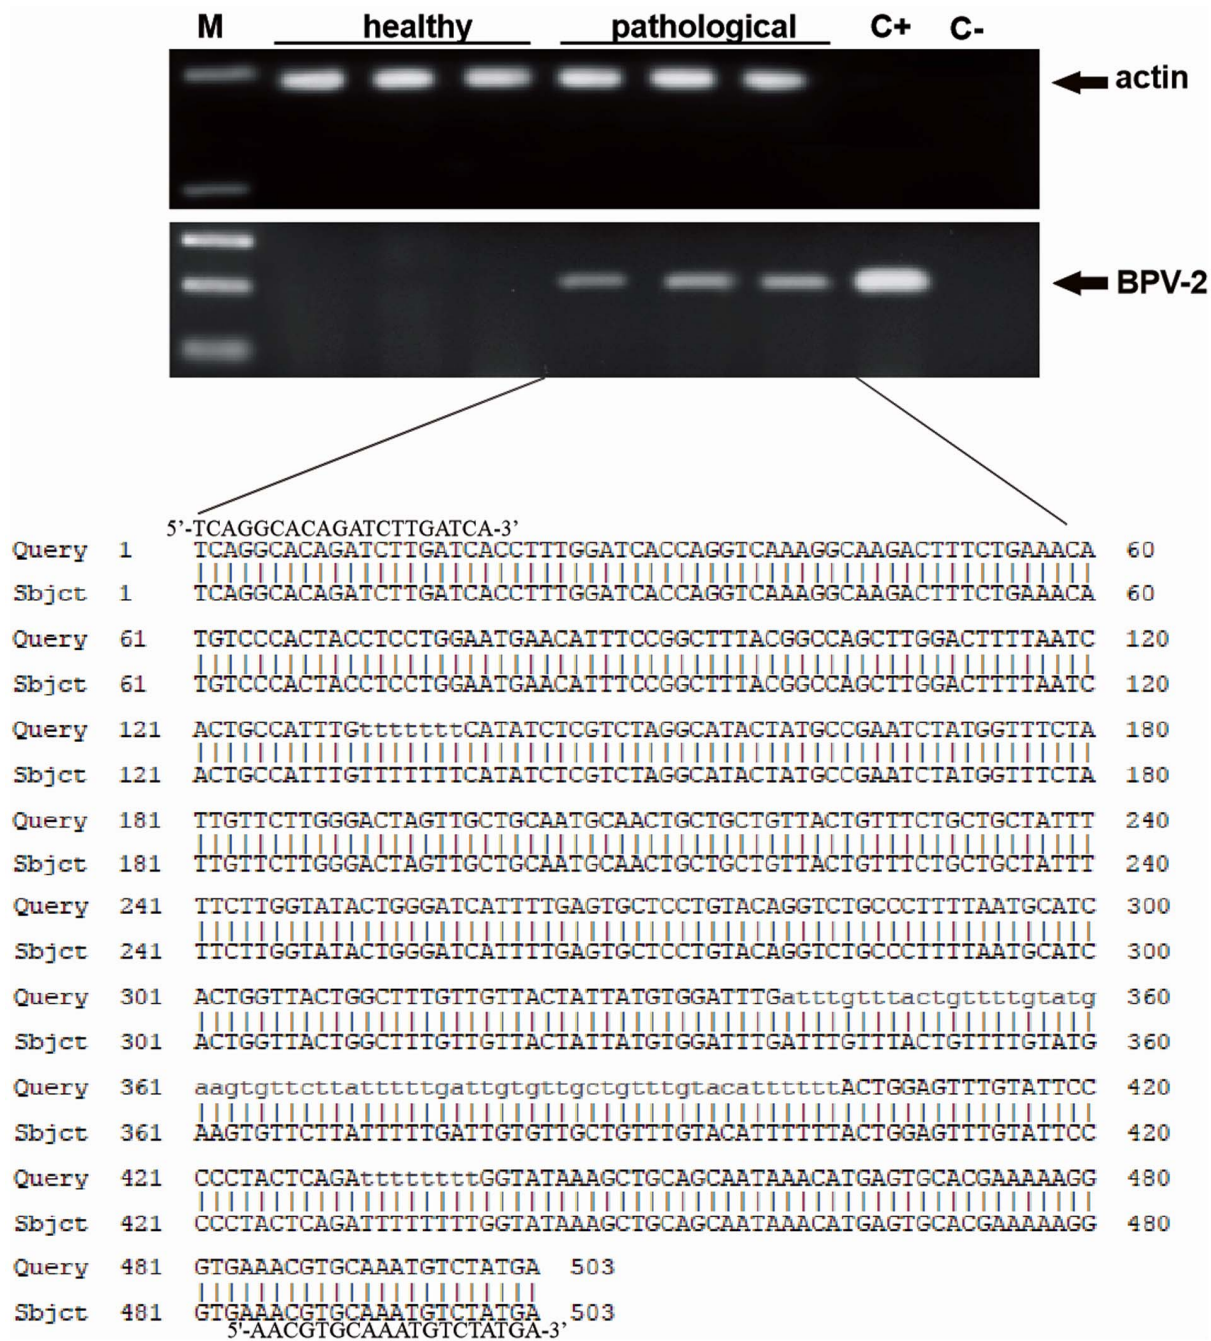

**Figure 1. PCR amplification and sequencing of BPV-2 DNA.** Lane M, Molecular mass marker (1 kb DNA Ladder, Microtech). Lanes 1–3: Three normal (control) samples from healthy cows. Lanes 4–6: three representative tumor samples. Lane C+: positive control containing a cloned BPV-2 DNA. Lane C-: negative control (no DNA added). The lower part of the figure shows 100% identity between the sequence of the amplicons in lanes 4–6 and the sequence of BPV-2 deposited in GenBank (M2019.1). doi:10.1371/journal.pone.0088860.g001

The major transforming protein encoded by BPV-2 is the 44-amino acid polypeptide E5. Bovine and human papillomavirus E5 proteins appear to be localized in the membranes of the endoplasmic reticulum, the Golgi apparatus and in the plasma membrane of the host cell [20]. It has been shown that E5 oncoprotein of bovine papillomavirus is responsible for cell transformation via several pathways [21,22] including the impairment of the V<sub>0</sub>-ATPase [23]. Furthermore, papillomavirus E5 protein is a powerful proteotoxic factor causing severe swelling

and fragmentation of the Golgi apparatus and extensive vacuolization of the cytoplasm [24].

In vitro studies have revealed that BPV E5 oncoprotein can impair the vacuolar H<sup>+</sup>-ATPase proton pump as it is able to bind to its component, the cellular protein 16 k ductin/subunit c of the V<sub>0</sub> domain [25]. This pump is essential for the acidification of the intracellular organelle compartments and may have an important role in protein sorting and processing [26]. Dysfunction of the H<sup>+</sup>-ATPase proton pump can result in the perturbation of acidifica-

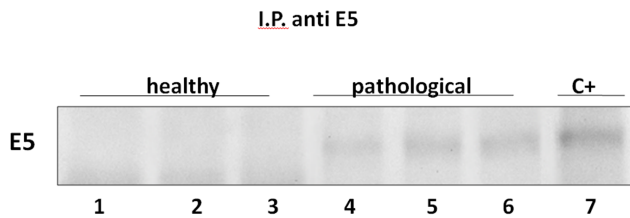

**Figure 2. BPV-2 E5 immunoprecipitation.** The presence of E5 protein detected by immunoprecipitation. a) Lanes 1–3: urinary bladders from healthy cows. Lanes 4–6: three representative urothelial tumors of the urinary bladder in cows. Lanes 7: positive control (bovine placenta infected with BPV-2). doi:10.1371/journal.pone.0088860.g002

tion of the endomembrane components and the cytosol. Furthermore, it has been suggested that the 16 k protein allows E5 to bind to the PDGF $\beta$ R, the activation of which has a central role in bovine bladder carcinogenesis [15,18,21,26,27].

Herein we present *in vivo* data showing that E5 binds to the subunit D of the V<sub>1</sub>-ATPase proton pump in naturally occurring urothelial bladder tumors in cattle.

## Materials and Methods

### Ethics Statement

In this study we did not perform any animal experiments. We collected the samples directly from public slaughterhouses; the animals were slaughtered following a mandatory clinical ante-mortem examination as required by European Union legislation.

### Tumor Samples

Fifteen bovine urothelial tumor samples and three normal (control) bladder samples were collected with the permission of the medical authorities in public and private slaughterhouses named

“Macello Comunale” of Muro Lucano (PZ), “Barbara Rocco sas” of Simbario (VV), “Real Beef srl” of Flumeri (AV).

Bladder samples were routinely divided into several parts. Some parts were fixed in 10% buffered formalin for microscopic investigations. The remaining parts were immediately frozen in liquid nitrogen and stored at  $-80^{\circ}\text{C}$  for subsequent biomolecular analysis.

### Histopathology

The tissues fixed in 10% buffered formalin were routinely paraffin embedded. Histologic diagnosis was assessed on 5- $\mu\text{m}$ -thick hematoxylin-eosin (HE)-stained sections using morphologic criteria suggested in the recent report on the new histological classification of urothelial tumors of the urinary bladder of cattle [4].

### Immunohistochemistry

All samples were stained and sections of normal bovine urinary bladder mucosa were tested in parallel as controls. Briefly, sections were deparaffinized, and blocked for endogenous peroxidase in 0.3% H<sub>2</sub>O<sub>2</sub> in methanol for 20 min. Antigen enhancement was performed by pretreating with microwave heating (twice for 5 min each at 750 W). The slides were washed three times with phosphate buffered saline (PBS, pH 7.4, 0.01 M). They were incubated for 1 h at room temperature with donkey serum (Santa Cruz Biotechnology Inc., CA, USA) diluted at 1 in 20 in PBS for the E5 detection and with protein block serum-free (DakoCytomation, Denmark) for V<sub>1</sub>-ATPase subunit D and pPDGF $\beta$ R detection. The following primary antibodies were used: a purified polyclonal sheep anti-BPV-2 E5 (a kind gift by Dr. L. Nasir, Glasgow University), a monoclonal mouse anti-V<sub>1</sub>-ATPase subunit D (Santa Cruz Biotechnology Inc., CA, USA) and a polyclonal goat anti-pPDGF $\beta$ R (phosphorylated at Tyr<sup>770</sup>) (Santa Cruz Biotechnology Inc., CA, USA). They were diluted at 1 in 5000, at 1 in 50, at 1 in 200 in phosphate buffered saline (PBS;

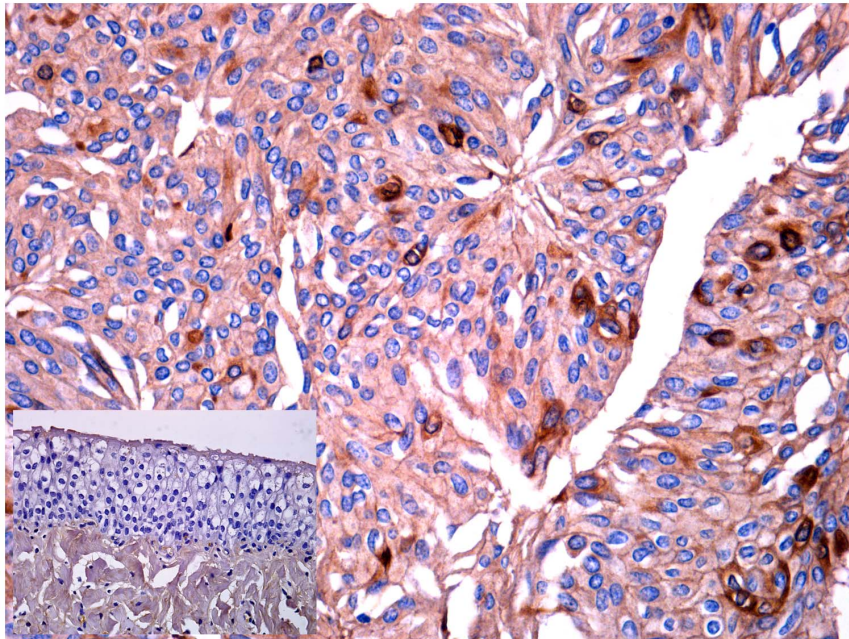

**Figure 3. BPV-2 E5 immunohistochemistry.** Urothelial carcinoma. Immunohistochemical detection of cytoplasmic E5 in neoplastic urothelial cells. E5-expressing cancer cells are scattered both in basal and suprabasal layers. Magnification,  $\times 550$ . Insert: normal (control) urothelium from healthy cows. Magnification,  $\times 550$ . doi:10.1371/journal.pone.0088860.g003



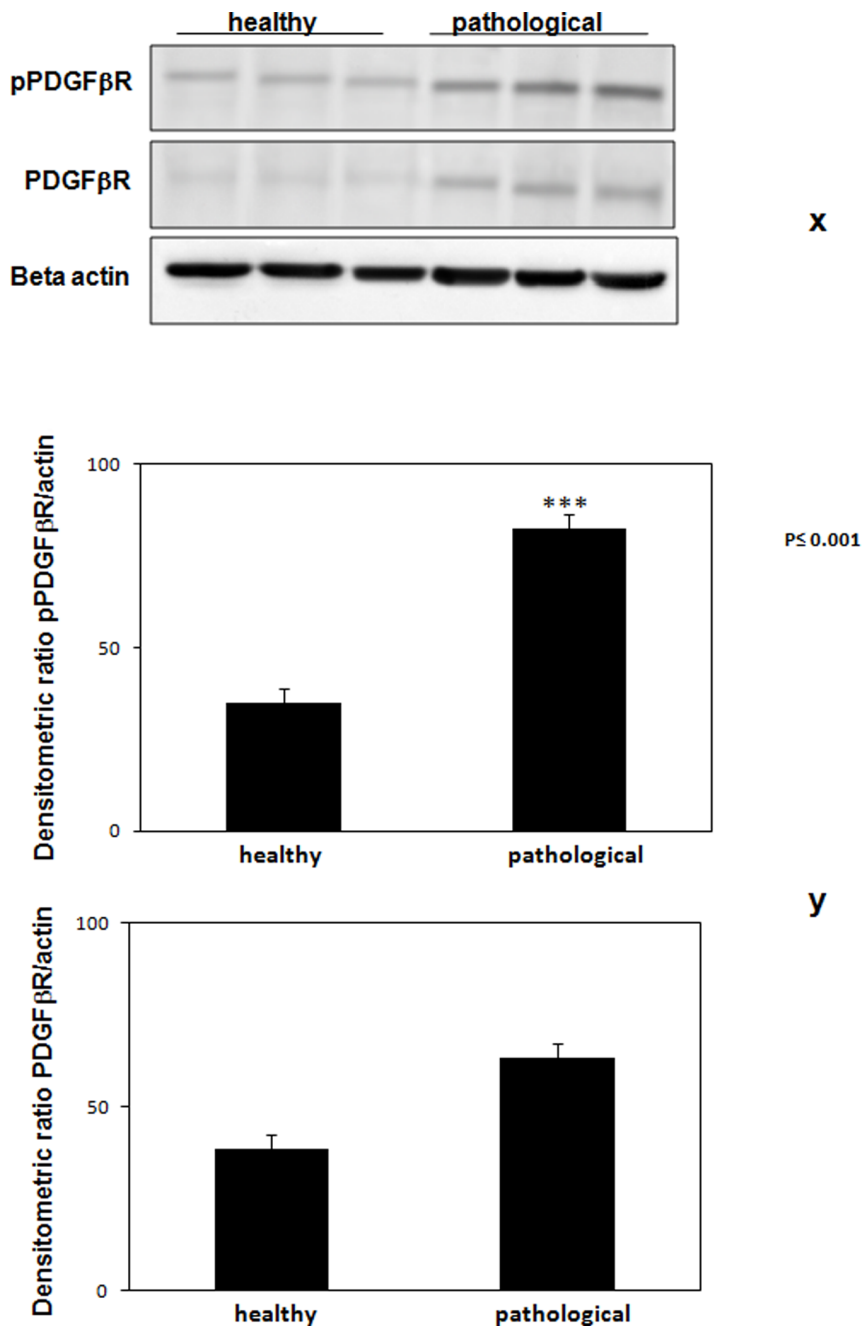

**Figure 4. Total and phosphorylated (activated) PDGFβR expression.** (x) Total protein extracts from tissue lysates were generated and used in Western blot analysis with an antibody specific for total PDGFβR and a phosphospecific PDGFβR antibody that recognized pPDGFβR phosphorylated at Tyr<sup>770</sup>. Lanes 1–3: urinary bladder from healthy animals. Lanes 4–6: representative neoplastic tissues from three cows with papillomavirus-associated tumors of the urinary bladder. Actin protein levels were detected to ensure equal protein loading. (y) Quantitative densitometric analysis of the filters was performed with Image Lab software (ChemIDoc; Bio-Rad Laboratories) and significance determined by the Student T-test (\*\*\*,  $p < 0.001$ ).

doi:10.1371/journal.pone.0088860.g004

pH 7.4, 0.01 M) for E5, V<sub>1</sub>-ATPase subunit D and pPDGFβR (phosphorylated at Tyr<sup>770</sup>) respectively and were applied overnight at room temperature in a humidified chamber. All the slides were washed for 20 min with PBS. Then the slides were incubated for 30 min with a secondary donkey anti-sheep antibody (Santa Cruz Biotechnology Inc., CA, USA) diluted at 1 in 100 in PBS for the E5 detection and with appropriate biotinylated secondary antibody (labelled streptavidin-biotin (LSAB) Kit; DakoCytoma-

tion, Denmark) for V<sub>1</sub>-ATPase subunit D and pPDGFβR detection. Sections were washed three times with PBS and then incubated with streptavidin-conjugated to horseradish peroxidase (LSAB Kit, DakoCytomation, Denmark). Color development was obtained by treatment with diaminobenzidine (DakoCytomation, Denmark) for 5–20 min. Sections were counterstained with Mayer's haematoxylin.



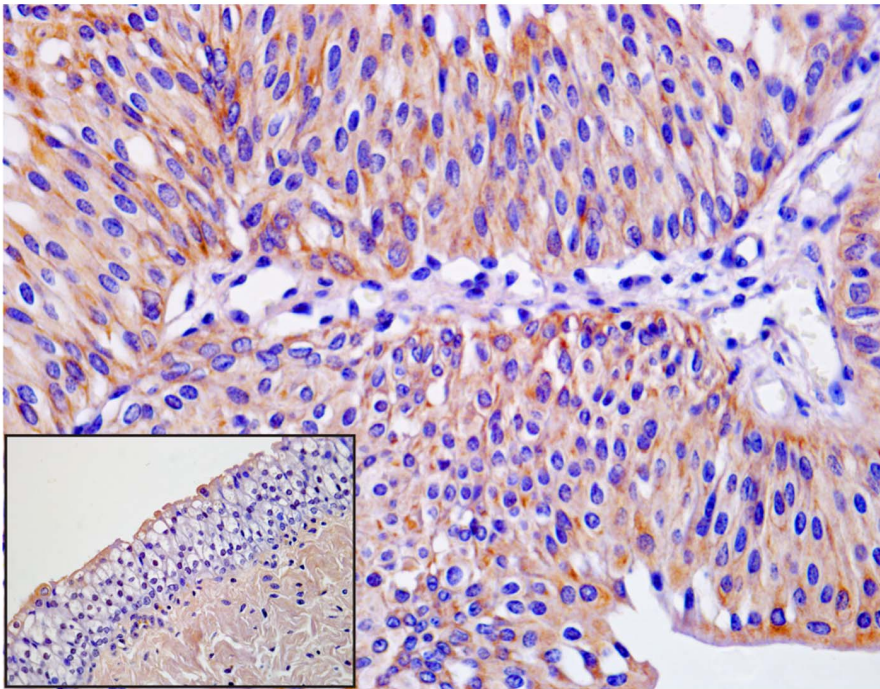

**Figure 5. pPDGF $\beta$ R immunohistochemistry.** Urothelial carcinoma. Immunohistochemical detection of phosphorylated PDGF $\beta$ R in neoplastic urothelial cells and in normal (control) urothelial cells as shown in the insert. Magnification,  $\times 550$ . doi:10.1371/journal.pone.0088860.g005

### Immunofluorescence

All samples were stained and sections of normal bovine urinary bladder mucosa were tested in parallel as control. For two-color immunofluorescence, sections were deparaffinized, rehydrated and heated in a microwave oven in citrate buffer (twice for 5 min each at 750 W) to allow antigen unmasking. Briefly, the sections were rinsed in PBS, pre-incubated for 1 h with normal donkey serum (diluted at 1 in 20) and then overlaid with the purified polyclonal sheep anti-BPV-2 E5 primary antibody diluted at 1 in 500 in phosphate buffered saline (PBS; pH 7.4, 0.01 M) (a kind gift by Dr. L. Nasir, Glasgow University) and the polyclonal goat anti-pPDGF $\beta$ R (phosphorylated at Tyr<sup>770</sup>) primary antibodies (Santa Cruz Biotechnology Inc., CA, USA) diluted at 1 in 25 in phosphate buffered saline (PBS; pH 7.4, 0.01 M) were applied overnight at room temperature in a humidified chamber.

Before the exposure to secondary antibodies, all the slides were washed for 20 min with PBS. A secondary antibody Alexa Fluor 488 donkey anti-sheep (Invitrogen, Molecular Probes) and a secondary antibody Alexa Fluor 546 donkey anti-goat (Invitrogen, Molecular Probes), diluted at 1 in 50 in PBS, were applied for 2 h at room temperature.

After washing 3 times with PBS, the slides were mounted under aqueous medium (Sigma-Aldrich, Milan, Italy).

An immunofluorescence staining was performed to detect V<sub>1</sub>-ATPase subunit D. The sections were treated as above, then the monoclonal mouse anti-V<sub>1</sub>-ATPase subunit D primary antibody (Santa Cruz Biotechnology Inc., CA, USA) diluted at 1 in 20 in phosphate buffered saline (PBS; pH 7.4, 0.01 M) was applied overnight at room temperature in a humid chamber. Before the exposure to secondary antibodies, all the slides were washed for 20 min with PBS. A secondary antibody Alexa Fluor 546 donkey anti-mouse (Invitrogen, Molecular Probes), diluted at 1 in 50 in PBS, was applied for 2 h at room temperature. After washing 3

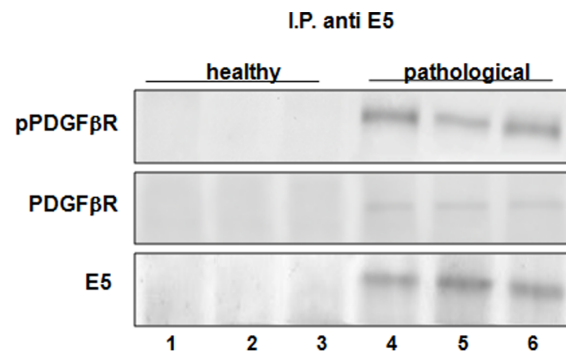

**Figure 6. BPV-2 E5 and PDGF $\beta$ R co-immunoprecipitation.** The presence of phosphorylated and total PDGF $\beta$ R was detected in E5 immunoprecipitates. Lanes 1–3: urinary bladder from healthy cows. Lanes 4–6: cancer tissue from three cows with papillomavirus-associated tumors of the urinary bladder. doi:10.1371/journal.pone.0088860.g006

times with PBS, the slides were mounted under aqueous medium (Sigma-Aldrich, Milan, Italy).

For two-color immunofluorescence staining of BPV-2 E5 and V<sub>1</sub>-ATPase subunit D, the sections were treated as above, then the polyclonal sheep anti-BPV-2 E5 (a kind gift by Dr. L. Nasir, Glasgow University) and the monoclonal mouse anti-V<sub>1</sub>-ATPase subunit D primary antibodies (Santa Cruz Biotechnology Inc., CA, USA) diluted respectively at 1 in 50 and 1 in 20 in phosphate buffered saline (PBS; pH 7.4, 0.01 M) were applied overnight at room temperature in a humid chamber. Before the exposure to secondary antibodies, all the slides were washed for 20 min with PBS. A secondary antibody Alexa Fluor 488 donkey anti-sheep

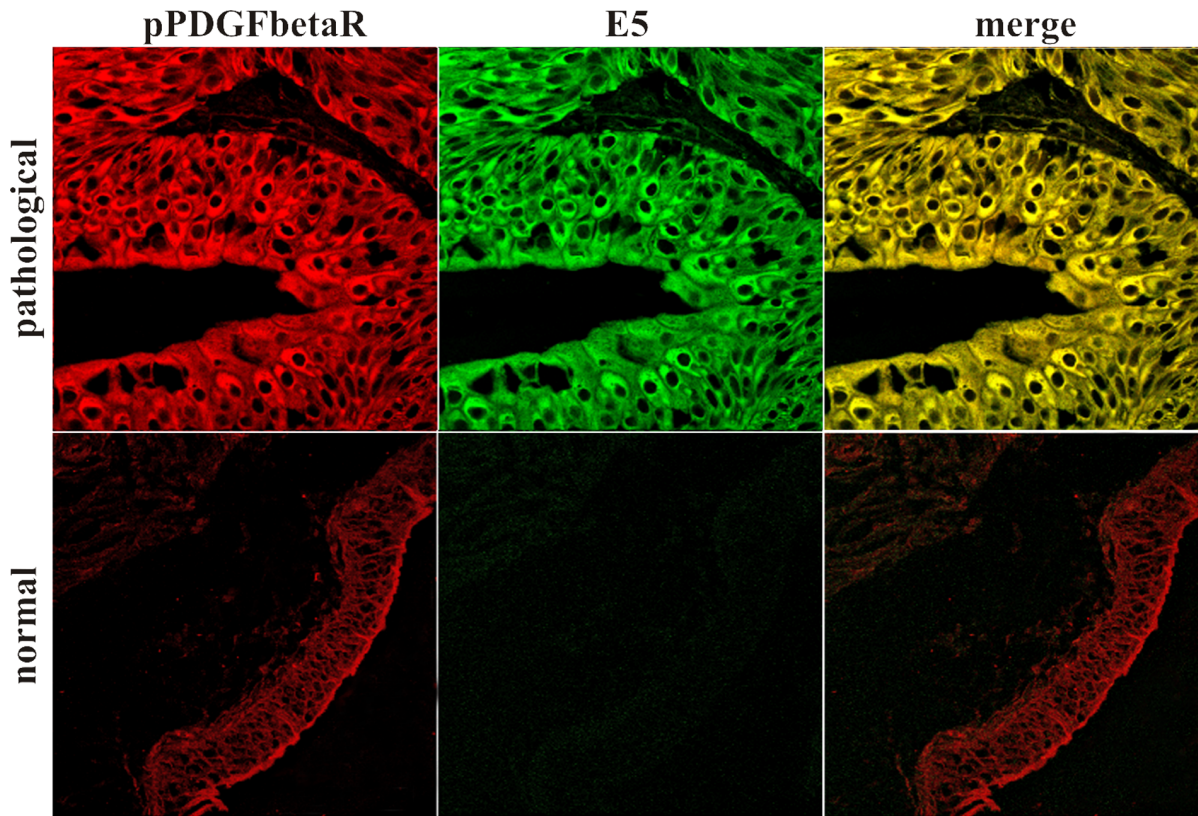

**Figure 7. E5 and pPDGFβR colocalization.** Urothelial carcinoma. Immunofluorescence detection of E5 and pPDGFβR and their colocalization (yellow in the merged images) in urothelial cancer cells (upper) vs normal (control) urothelial cells (lower). Magnification  $\times 550$ . doi:10.1371/journal.pone.0088860.g007

(Invitrogen, Molecular Probes) and a secondary antibody Alexa Fluor 546 donkey anti-mouse (Invitrogen, Molecular Probes), diluted at 1 in 50 in PBS, were applied for 2 h at room temperature.

After washing 3 times with PBS, the slides were mounted under aqueous medium (Sigma-Aldrich, Milan, Italy).

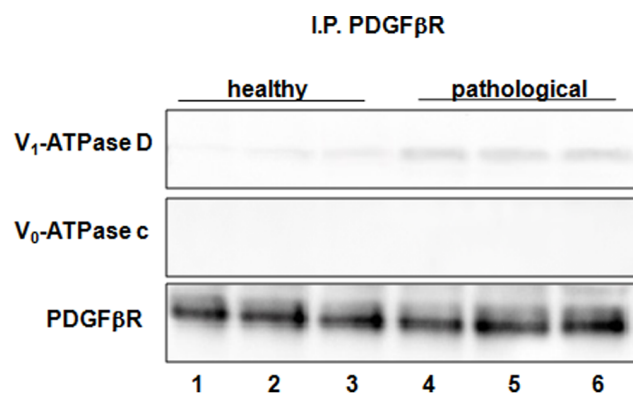

**Figure 8. PDGFβR and V<sub>1</sub>-ATPase co-immunoprecipitation.** PDGFβR interaction with V<sub>1</sub>-ATPase subunit D is increased in immunoprecipitates derived from pathological tissues. V<sub>0</sub>-ATPase c subunit does not co-immunoprecipitate with PDGFβR. Lanes 1–3: urinary bladder from healthy cows. Lanes 4–6: cancer tissue from three cows with papillomavirus-associated tumors of the urinary bladder. doi:10.1371/journal.pone.0088860.g008

For two-color immunofluorescence staining of V<sub>1</sub>-ATPase subunit D and pPDGFβR (phosphorylated at Tyr<sup>770</sup>), the sections were treated as above, then the monoclonal mouse anti-V<sub>1</sub>-ATPase subunit D primary antibody (Santa Cruz Biotechnology Inc., CA, USA) diluted at 1 in 20 in phosphate buffered saline (PBS; pH 7.4, 0.01 M) and the polyclonal goat anti-pPDGFβR (phosphorylated at Tyr<sup>770</sup>) primary antibody (Santa Cruz Biotechnology Inc., CA, USA) diluted at 1 in 25 in phosphate buffered saline (PBS; pH 7.4, 0.01 M) were applied overnight at room temperature in a humid chamber. Before the exposure to secondary antibodies, all the slides were washed for 20 min with PBS. A secondary antibody Alexa Fluor 546 donkey anti-mouse (Invitrogen, Molecular Probes) and a secondary antibody Alexa Fluor 488 donkey anti-goat (Invitrogen, Molecular Probes), diluted at 1 in 50 in PBS, were applied for 2 h at room temperature.

After washing 3 times with PBS, the slides were mounted under aqueous medium (Sigma-Aldrich, Milan, Italy).

For all immunofluorescence observations and photography, a laser scanning confocal microscope LSM-510 (Zeiss, Göttingen, Germany) was used.

#### In-gel Digestion of IP Protein

Gel bands for mass spectrometric analysis were basically processed according to Shevchenko et al. [39]. Sliced gel pieces were washed with 100 mM NH<sub>4</sub>HCO<sub>3</sub> and acetonitrile (1:1, v/v) (buffer A). HPLC-grade acetonitrile was obtained from Sigma-Aldrich (St. Louis, MO). Proteins were in-gel reduced by 10 mM DTT, and subsequently alkylated with 20 mM iodoacetamide. After a washing step with buffer A, the gel pieces were dried in a vacuum centrifuge, and rehydrated at 4°C in digestion buffer



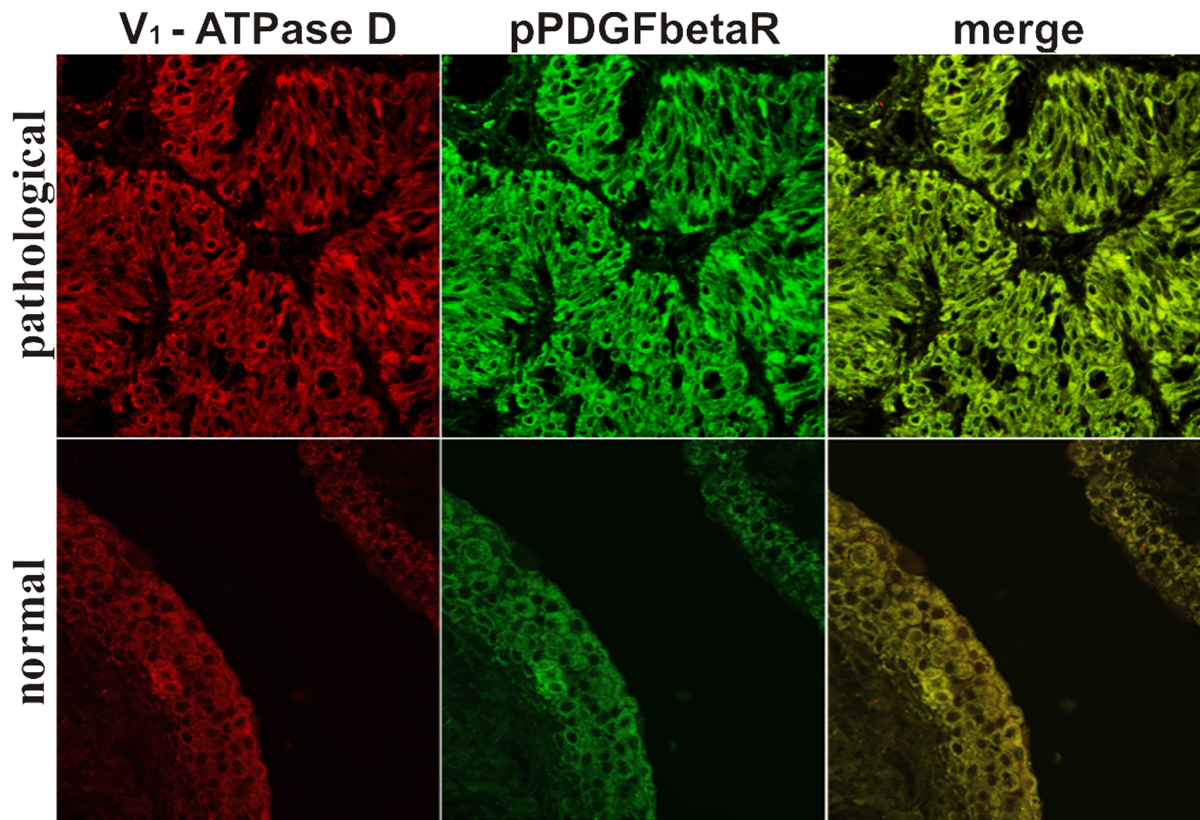

**Figure 9. V<sub>1</sub>-ATPase subunit D and pPDGFβR colocalization.** Urothelial carcinoma. Immunofluorescence detection of the V<sub>1</sub>-ATPase subunit D and the pPDGFβR and their colocalization signal (yellow in the merged image). Magnification, ×550.  
doi:10.1371/journal.pone.0088860.g009

(50 mM NH<sub>4</sub>HCO<sub>3</sub>, 5 mM CaCl<sub>2</sub>) containing 25 ng/μl trypsin. After overnight incubation, the peptides were extracted from the gel using three separate washings with a mixture of acetonitrile/water/formic acid 70/25/5 (v/v/v). The extracts were combined and dried down in a vacuum centrifuge. The lyophilized digest was reconstituted in 30 μl of loading pump solvent (see nano LC-MS/MS Section). Ten μl of the solution were then injected for nano LC-MS/MS analysis.

#### Nano LC-MS/MS and Database Search

Chromatography was performed using an Ultimate nanoscale liquid chromatography (nano LC) system from Dionex (Sunnyvale, CA). The analytical nano LC column used was an in-house packed 75 μm i.d., 40 cm long Integra Frit™ column obtained from New Objective (Cambridge, MA), filled with 4 μm C<sub>12</sub> silica particles Jupiter Proteo from Phenomenex (Torrence, CA). Ten μL of the peptide mixture were loaded onto an in-house packed

150 μm i.d., 3 cm long Integra Frit™ (New Objective) trapping column (packing bed length 1 cm) at 12 μL/min of loading pump solvent, consisting of H<sub>2</sub>O/acetonitrile/trifluoroacetic acid (TFA) 97.95:2:0.05 (v/v/v). After 2 minutes washing, the trapping column was switched on-line to the analytical column, and gradient separation started at 200 nL/min.

A binary gradient was used for peptide elution. Mobile phase A was H<sub>2</sub>O/acetonitrile/formic acid/TFA 97.9:2:0.09:0.01 (v/v/v/v); mobile phase B was H<sub>2</sub>O/acetonitrile/formic acid/TFA 29.9:70:0.09:0.01 (v/v/v/v). Gradient was from 5 to 45% B in 60 minutes at 200 nL/min flow rate. After 10 minutes at 95% B, the column was re-equilibrated at 5% B for 30 minutes before the following injection.

MS detection was performed on a QSTAR XL hybrid mass spectrometer from Applied Biosystems (Foster City, CA) operating in positive ion mode, with nanoelectrospray (nESI) potential at 1800 V, curtain gas at 15 units, CAD gas at 3 units. nESI ionization was achieved via distal coated Pico Tips™ 20 μm ID,

**Table 1.** Protein identified by nanoLC-MS/MS analysis of IP band.

| Accession  | Protein Description                          | N.Peptides | Peptide Information                                                                  | Protein Theor.Mw |
|------------|----------------------------------------------|------------|--------------------------------------------------------------------------------------|------------------|
| VATD_BOVIN | V <sub>1</sub> -type proton ATPase subunit D | 1          | Sequence: IEIFPSR Mascot score: 14<br>Theoretical Mw: 860.48 Experimental Mw: 860.47 | 28 kDa           |

Peptide sequence, and relative protein entry, identified in IP band. Minimum Mascot score for confident identification was 14. MS/MS spectrum was manually validated. Contaminants such as human keratins and trypsin were excluded from the list.  
doi:10.1371/journal.pone.0088860.t001



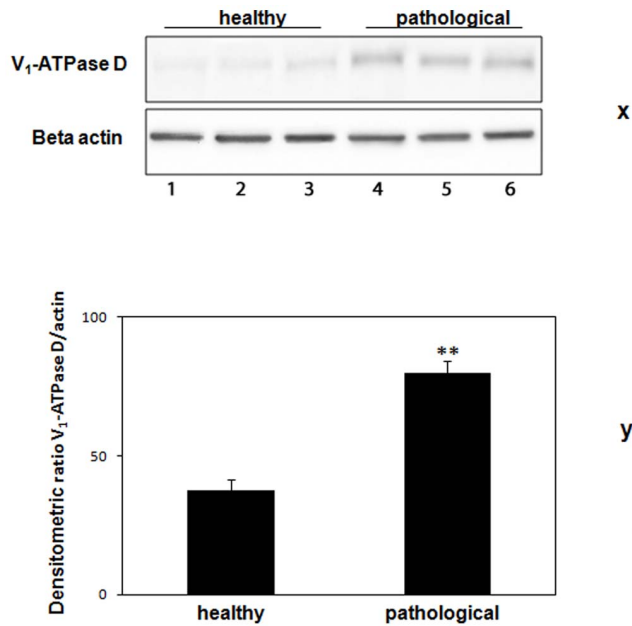

**Figure 10. V<sub>1</sub>-ATPase subunit D expression.** (x) Western blot analysis showing overexpression of V<sub>1</sub>-ATPase subunit D. Lanes 1–3: urinary bladder from healthy animals. Lanes 4–6: neoplastic tissue from representative three cows with papillomavirus-associated tumors of the urinary bladder. Actin protein levels were detected to ensure equal protein loading. (y) Quantitative densitometric analysis of the filters was performed with Image Lab software (ChemiDoc; Bio-Rad Laboratories) and significance determined by the Student T-test (\*\*,  $p < 0.01$ ). doi:10.1371/journal.pone.0088860.g010

10  $\mu$ m tip ID (New Objective). Information-dependent acquisition (IDA) was performed by selecting the two most abundant peaks for MS/MS analysis after a full TOF-MS scan from 400 to 1600  $m/z$  lasting 4 seconds. Both MS/MS analyses were performed in enhanced mode (3 seconds/scan). Threshold value for peak selection for MS/MS was 20 counts.

Data were searched on the Mascot search engine (www.matrixscience.com) against the Swiss Prot database using the following parameters: MS tolerance 10 ppm; MS/MS tolerance 0.3 Da; fixed modifications carbamidomethyl cysteine; enzyme trypsin; max. missed cleavages 1; taxonomy other mammalia.

Protein hits based on two successful peptide identifications were considered valid. Protein hits based on a single peptide identification with Mascot score higher than the significance level ( $>14$ ) were retained after manual validation.

### BPV-2 E5 and PDGF $\beta$ R Immunoprecipitation

Tissues were lysed in ice-cold buffer containing 50 mM Tris-HCl (pH 7.5), 1% (v/v) Triton X-100, 150 mM NaCl, 2 mM PMSF, 1.7 mg/ml Aprotinin, 50 mM NaF, and 1 mM sodium orthovanadate. The protein concentration was measured using the Bradford assay (Bio-Rad Laboratories, Milan, Italy). Proteins (1000  $\mu$ g) were immunoprecipitated using 2  $\mu$ g of anti-E5 antibody (a kind gift of Dr L. Nasir, Glasgow University) or anti-PDGF $\beta$ R antibody (Santa Cruz Biotechnology, CA, USA) and 30  $\mu$ l of Protein A/G-Plus Agarose (Santa Cruz Biotechnology, CA, USA). Immunoprecipitates were washed four times in complete lysis buffer (above), finally heated in 1X Laemmli sample buffer at 100°C for 10 minutes. Immunoprecipitates were separated on polyacrylamide gels and transferred to nitrocellulose filter membranes (Ge Healthcare Life Sciences, Chalfont St Giles,

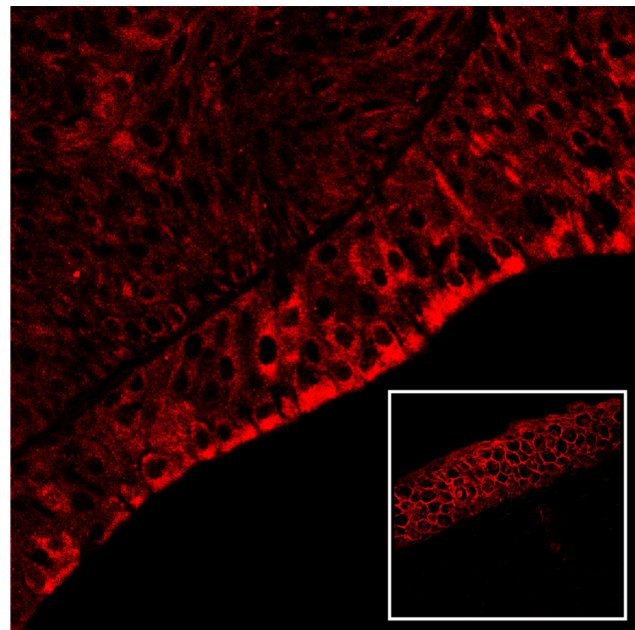

**Figure 11. V<sub>1</sub>-ATPase subunit D immunofluorescence.** Urothelial carcinoma. The overexpression of the subunit D of the V<sub>1</sub>-domain is also detected by immunofluorescence. The subunit D appears to be overexpressed both in the membrane and in the cytoplasm of urothelial cancer cells compared to urothelial normal cells (insert). Magnification,  $\times 550$ . doi:10.1371/journal.pone.0088860.g011

UK) for 16 h at 30 mA in 192 mM glycine/25 mM Tris-HCl (pH 7.5)/10% methanol. Membranes were blocked for 1 h at room temperature in 5% nonfat dry milk, incubated with anti-E5 antibody, anti-PDGF $\beta$ R, anti-pPDGF $\beta$ R (phosphorylated at Tyr<sup>770</sup>), anti-V<sub>1</sub>-ATPase subunit D (Santa Cruz Biotechnology, CA, USA), and anti-V<sub>0</sub>-ATPase c subunit (Cosmo Bio CO, Japan) overnight at 4°C. After three washes in Tris-buffered saline, membranes were incubated with rabbit anti-sheep IgG-horseradish peroxidase (HRP) (Santa Cruz Biotechnology, CA, USA) or with goat anti-rabbit or anti-mouse IgG (Bio-Rad Laboratories, Milan, Italy) for 60 min at room temperature. Proteins were visualized by enhanced chemiluminescence system (Western Blotting Luminol Reagent, Santa Cruz Biotechnology, CA, USA) and ChemiDoc XRS Plus (Bio-Rad Laboratories, Milan, Italy). Images were acquired with Image Lab Software version 2.0.1 (Bio-Rad Laboratories, Milan, Italy).

### BPV-2 DNA Detection and Sequencing

DNA was extracted from urinary bladder samples from frozen pathological and normal (control) bladder samples using the DNeasy Tissue kit (Qiagen, Milan, Italy) according to the manufacturer's protocol. All the samples were lysed using proteinase K. Lysates were loaded onto DNeasy spin columns. After two washing steps pure DNA was eluted with low salt buffer. To amplify the entire BPV-2 genome, the purified DNA was subjected to multiply primed rolling-circle amplification using a reaction mixture containing 20 ng sample DNA, 12.5  $\mu$ M of each primer, 4 mM dNTPs and 10 U phi 29 DNA polymerase (Fermentas, Milan, Italy). The resulting linear dsDNA product was purified using MinElute PCR Purification kit (Qiagen, Milan, Italy). For the detection of BPV-2 DNA, specific primers for a 503 bp DNA amplicon encompassing the BPV-2 E5-L2 ORF sequence (nt 3723–4225) were designed by Primer BLAST

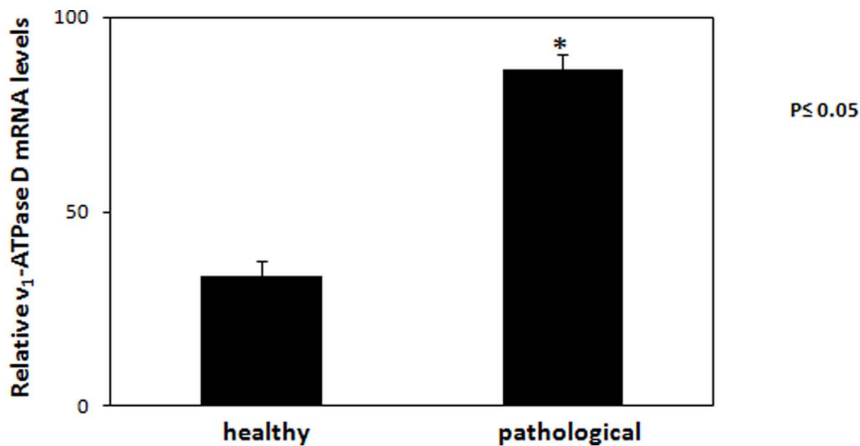

**Figure 12. RT-PCR for subunit D.** The relative expression levels of V<sub>1</sub>-ATPase subunit D in neoplastic tissues. V<sub>1</sub>-ATPase subunit D mRNA levels were determined by qRT-PCR. Relative mRNA levels, calculated using the  $\Delta\Delta C_T$  method, represent fold changes in comparison to urinary bladder samples from healthy cows. All values were normalized to the internal control  $\beta$ -actin. Results represent the means and standard deviations of three independent experiments performed in triplicate. (\*,  $p < 0.05$ , vs urinary bladder from healthy cows). doi:10.1371/journal.pone.0088860.g012

software (forward, 5'-TCAGGCACAGATCTTGATCA-3'; reverse, 5'-TCATAGACATTTGCACGTT-3'). To evaluate the adequacy of the DNA samples, a control PCR for bovine  $\beta$ -actin sequence was performed using a set of primers designed by Primer BLAST software (forward, 5'-GAGCGTGGCTACAGCTT-CAC-3'; reverse, 5'-CATTGCCGATGGTGATGA-3'). Aliquots 50–100 ng of purified DNA were amplified in 25  $\mu$ l of reaction mixture containing 2 mM MgCl<sub>2</sub>, 200  $\mu$ M each dNTP, 480 nM of each primer and 2.5 U of AmpliTaq Gold DNA Polymerase (Applied Biosystems, Monza, Italy). The reaction was carried out in a thermocycler (Veriti, Applied Biosystems, Monza, Italy) with an initial denaturation step of 3 min. Then, 35 cycles of amplification were carried out with a denaturation step at 94°C for 40 sec, an annealing step at 60°C, 30 sec, for  $\beta$ -actin or at 50°C, 40 sec, for BPV-2, and an extension step at 72°C for 1 min. A final extension step at 72°C for 7 min was performed in each PCR assay. Detection of the amplified products was carried out by electrophoresis on ethidium bromide-stained agarose gel. In each experiment, a blank sample consisting of reaction mixture without DNA and a positive sample consisting of cloned BPV-2 (a kind gift by Dr. A. Venuti) were included. The amplified DNA was subjected to direct sequencing in an automated apparatus (ABI Prism 3100 Genetic Analyzer; Applied Biosystems, Monza, Italy).

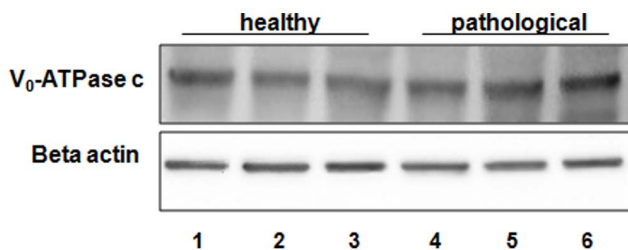

**Figure 13. V<sub>0</sub>-ATPase c subunit expression.** Western blot analysis showing similar expression levels of V<sub>0</sub>-ATPase c subunit among all the samples. Lanes 1–3: urinary bladder from healthy animals. Lanes 4–6: neoplastic tissue from representative three cows with papillomavirus-associated tumors of the urinary bladder. Actin protein levels were detected to ensure equal protein loading. doi:10.1371/journal.pone.0088860.g013

### Western Blot Analysis

Healthy and diseased bladders were solubilized at 4°C in lysis buffer containing 50 mM Tris-HCl pH 7.5, 150 mM NaCl, 1% Triton X-100. Immediately prior to use, the following reagents were added: 1 mM DTT, 2 mM PMSF, 1.7 mg/ml Aprotinin, 25 mM NaF, 1 mM Na<sub>3</sub>VO<sub>4</sub> (Sigma-Aldrich, Milan, Italy).

Lysates were clarified at 500 $\times$ g for 20 min. The protein concentration was measured using the Bradford assay (Bio-Rad Laboratories, Milan, Italy). For Western blotting, 50  $\mu$ g of lysate proteins were heated at 100°C in 4X premixed Laemmli sample buffer (Bio-Rad Laboratories, Milan, Italy). Proteins were subjected to sodium dodecyl sulfate–polyacrylamide gel electrophoresis (SDS–PAGE) under reducing conditions.

After electrophoresis, proteins were transferred onto nitrocellulose filter membranes (GE Healthcare Life Sciences, Chalfont St Giles, UK) for 1 h at 10 V in 192 mM glycine/25 mM Tris-HCl (pH 7.5)/10% methanol using a Trans-Blot SD Semi Dry cell (Bio-Rad Laboratories, Milan, Italy) according to the manufacturer's instructions. The membranes were blocked with 5% non-fat dry milk in Tris-buffered saline (TBS, pH 7.5) for 1 h at room temperature, washed with TBS-0.1% Tween. Then, filters were probed both with anti-PDGFR $\beta$ , anti-pPDGFR $\beta$  (phosphorylated at Tyr<sup>770</sup>), and anti-V<sub>1</sub>-ATPase subunit D antibody (Santa Cruz

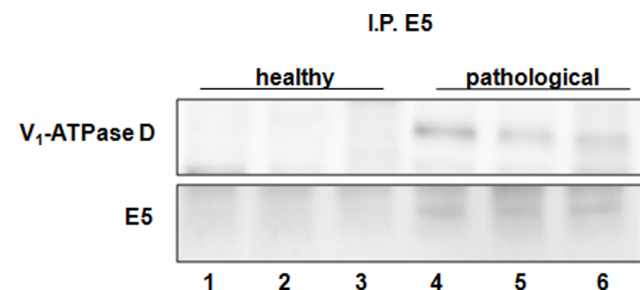

**Figure 14. BPV-2 E5 and V<sub>1</sub>-ATPase subunit D co-immunoprecipitation.** The presence of V<sub>1</sub>-ATPase subunit D was detected in E5 immunoprecipitates. Lanes 1–3: urinary bladder from healthy cows. Lanes 4–6: neoplastic tissue from three cows with papillomavirus-associated tumors of the urinary bladder. doi:10.1371/journal.pone.0088860.g014

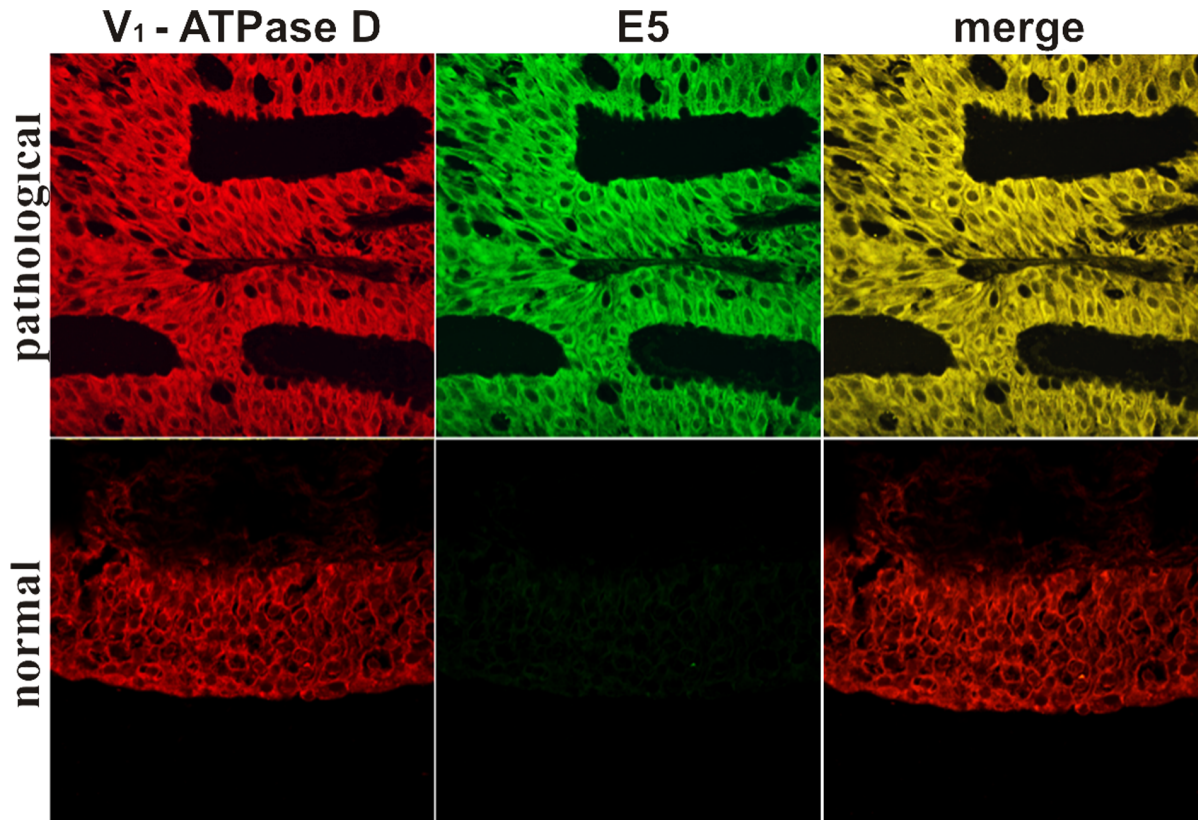

**Figure 15. V<sub>1</sub>-ATPase subunit D and BPV-2 E5 colocalization.** Urothelial carcinoma. Immunofluorescence detection of E5 and the subunit D. The proteins appear to colocalize (yellow in the merged image). doi:10.1371/journal.pone.0088860.g015

Biotechnology, CA, USA) for an overnight incubation at 4°C. After three washes in Tris-buffered saline, membranes were incubated with horseradish peroxidase-conjugated anti-rabbit IgG or anti-mouse IgG (Bio-Rad Laboratories, Milan, Italy) and anti-goat IgG (Santa Cruz Biotechnology, CA, USA), for 1 h at room temperature. After appropriate washing steps, protein detection and image acquisition were performed as above reported.

#### RNA Extraction

Total RNA was extracted from urinary bladders of cows using the RNeasy Mini Kit (Qiagen, Milan, Italy), according to the manufacturer's instructions. The RNA quality was determined by agarose gel electrophoresis and ultraviolet spectrophotometer analysis. The RNA was treated with RNase-free DNase I Fermentas Life Sciences (Dasit, Milan, Italy) to remove potential DNA contamination.

#### cDNA Synthesis and Real Time-PCR Analysis (RT-PCR) for V<sub>1</sub>-ATPase Subunit D

For Real Time-PCR analysis, 500 ng RNA were reverse-transcribed using the iScript cDNA Synthesis Kit (Bio-Rad Laboratories, Milan, Italy) and the reaction was incubated at 25°C for 5 min, 42°C for 30 min, 85°C for 5 min, and then kept at 4°C for 5 min. Real Time reactions were performed using SsoFast EvaGreen Supermix (Bio-Rad Laboratories, Milan, Italy). For the detection of V<sub>1</sub>-ATPase subunit D specific primers (forward primer, 5'-AAGACTCAGTGGCTGGGTTG-3'; reverse primer, 5'-AGGTTTCGACCTGTCTGTGC-3') were used. All reactions were performed in triplicate and β-actin was used as the internal standard (forward primer 5'-TAGCA-CAGGCCTCTCGCCTTCG-3'; reverse primer 5'-GCA-CATGCCGGAGCCGTTGT-3').

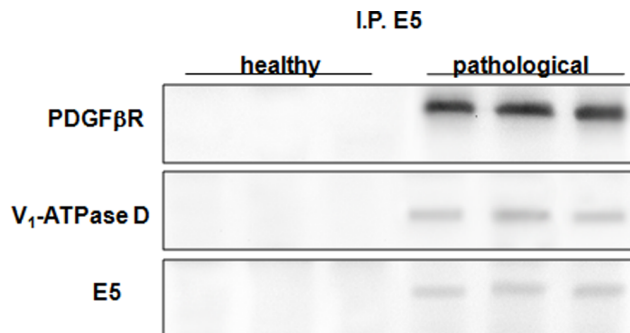

**Figure 16. BPV-2 E5, PDGFβR and V<sub>1</sub>-ATPase D subunit co-immunoprecipitation.** The presence of PDGFβR and V<sub>1</sub>-ATPase D subunit was detected in E5 immunoprecipitates. Lanes 1–3: urinary bladder from healthy cows. Lanes 4–6: tissue from three cows with papillomavirus-associated tumors of the urinary bladder. doi:10.1371/journal.pone.0088860.g016



## Results

### Microscopical Pattern of the Tumors

Histological patterns of urothelial tumors of the urinary bladder of cattle were consistent with the diagnosis of papillary urothelial neoplasm of low malignant potential (PUNLMP) (two cases), papillary and invasive urothelial cancers (nine and four cases, respectively).

### PCR Analysis and BPV-2 Sequencing

PCR yielded BPV-2 DNA fragments of anticipated size (503 bp) for all neoplastic lesions. No BPV-2 DNA was detected in normal (control) bladder samples (Figure 1). The presence of BPV-2 DNA was also confirmed by sequencing (Figure 1) according to BPV-2 sequence M20219.1.

### Immunoprecipitation and Immunohistochemistry for BPV-2 E5 Protein

The expression of E5 was detected by immunoprecipitation and immunohistochemistry in tumor samples. E5 immunoreactivity was evident in cells located in basal and suprabasal urothelial layers (Figure 2 and 3).

### Coimmunoprecipitation and Colocalization of E5 Oncoprotein with PDGF $\beta$ R

Previous *in vivo* studies have shown that E5 binds to the activated (phosphorylated) form of PDGF $\beta$ R in bladder tumors [18,21,27]. Indeed, PDGF $\beta$ R appeared to be constitutively expressed and its phosphorylation was increased in the tumor samples compared to the healthy ones as detected in total lysates (Figure 4). The activation of the phosphorylated PDGF $\beta$ R was also documented by immunohistochemical investigations (Figure 5).

A coimmunoprecipitation experiment using an anti-E5 antibody was carried out and PDGF $\beta$ R and pPDGF $\beta$ R were detected by Western blot in the immunoprecipitates (Figure 6). Morphologically, the E5/pPDGF $\beta$ R complex was shown by confocal microscopy: E5 and the activated form of the PDGF $\beta$ R appeared to co-localize as judged by the yellow fluorescence of the merged images (Figure 7). Normal urothelium yielded no E5 signal.

### PDGF $\beta$ R Binds to the Component D of V<sub>1</sub>-ATPase: Proteomic Analysis

*In vitro*, PDGF $\beta$ R can bind to the proteolipid ring of V<sub>0</sub> sector of the proton pump in absence of E5, it has been suggested that E5 binds to the PDGF $\beta$ R via the subunit c of the ring. However, these data have been obtained for medium-adapted cultured cells and hence may not reflect the authentic *in vivo* situation, for which no information is available thus far [26].

Accordingly, we investigated whether a similar complex could take place *in vivo* and performed immunoprecipitation of PDGF $\beta$ R on bladder carcinoma tissue and on control normal bladder tissue from healthy cattle.

Proteins contained in the two PDGF $\beta$ R pull-downs from bladder tumor samples and from normal bladder tissue, were separated with SDS-PAGE and detected with Coomassie staining. Differential analysis between the protein bands contained in the two immunoprecipitates revealed a single band present in the PDGF $\beta$ R pull-down from bladder tumor samples only. The differential band was excised and *in-gel* digested with trypsin. The peptides were injected for nano LC-MS/MS analysis. Database search of MS/MS spectra allowed the identification of the protein "V<sub>1</sub>-ATPase subunit D" (Table 1). Because the protein has been

identified by a single peptide hit having a low Mascot score, this result needed to be validated by further investigations. For this purpose, we performed Western blot analysis using an anti-subunit D antibody on the PDGF $\beta$ R immunoprecipitates. This allowed us to detect the presence of the subunit D (Figure 8). We also performed Western blot analysis using an anti-subunit c antibody on these immunoprecipitates as the PDGF $\beta$ R/subunit c complex was documented in *in vitro* studies [25]. We did not detect the subunit c of the V<sub>0</sub>-ATPase domain (Figure 8). The complex pPDGF $\beta$ R/subunit D of the V<sub>1</sub>-ATPase was shown by immunofluorescence studies as the two proteins appeared to colocalize by confocal microscopy (Figure 9).

### Western Blot Analysis of the Subunit D

We performed immunoblotting to reveal the total level of the subunit D of the V<sub>1</sub>-domain. Overexpression of subunit D could be shown by immunoblotting (Figure 10) and morphologically documented by immunofluorescence (Figure 11). Furthermore, a statistically significant increase of the transcripts of this subunit was also shown by RT-PCR (Figure 12). Normal levels of the constitutively expressed subunit c were detected by Western blot both in healthy and tumor samples (Figure 13).

### Coimmunoprecipitation and Colocalization of E5 Oncoprotein with the Subunit D of the V<sub>1</sub>-ATPase

Using Western blot, we detected the subunit D of the V<sub>1</sub>-domain of the proton pump in E5 immunoprecipitates (Figure 14). Morphologically, this complex was demonstrated by confocal microscopy as E5 and subunit D appeared to colocalize (Figure 15). Normal urothelium yielded no E5 signal.

Ultimately, both pPDGF $\beta$ R and subunit D of the V<sub>1</sub>-ATPase were found by Western blot in E5 immunoprecipitates (Figure 16).

## Discussion

Our results indicate, for the first time, that a ternary complex composed of BPV-2 E5 oncoprotein/PDGF $\beta$ R/subunit D of V<sub>1</sub>-ATPase is present in urothelial cells of naturally occurring tumors of the bovine urinary bladder.

It has been shown that bovine papillomavirus E5 interacts with the subunit c of the V<sub>0</sub> domain in cultured cells [25]. As PDGF $\beta$ R can bind to the subunit c in the absence of E5, it has been suggested that E5 binds to PDGF $\beta$ R via its association with subunit of V<sub>0</sub>-ATPase proton pump [26].

Our *in vivo* findings appear to be different from previous *in vitro* results and show that the complex composed of E5 and the activated form of PDGF $\beta$ R is associated with the overexpressed subunit D of the V<sub>1</sub> domain, which catalyzes ATP hydrolysis, but not with the subunit c of the V<sub>0</sub> domain responsible for H<sup>+</sup> translocation. Furthermore, the subunit c appeared to be constitutively expressed, as normal levels of expression were shown to occur both in normal and neoplastic tissues.

It has been suggested that cell perturbation resulting from binding of the subunit c of the proton pump and E5 oncoprotein is responsible for Golgi alkalization which, in turn, leads to the activation of Golgi-associated Src molecules. Indeed, Golgi alkalization and c-Src are involved in a common mechanism leading to E5-dependent NIH3T3 cell transformation [28].

The subunit D of the V<sub>1</sub> complex belongs to a central rotor stalk, which is composed also of F subunit. These proteins are bound directly to the subunit d of the V<sub>0</sub> sector that links to the c ring. Therefore, the central stalk (DFd complex) connects the V<sub>1</sub> and V<sub>0</sub> domains. It serves as a rotor that couples the energy that is released from the hydrolysis of ATP to the rotation of the

proteolipid c ring of the V<sub>0</sub>-ATPase pump and causes active transport of protons thus regulating the pH (acidification) of intracellular organelles and cytosol [29–31]. The controlled pH of the intracellular compartments is crucial for many biological processes, including membrane trafficking and protein degradation. It is conceivable that in naturally occurring bovine bladder cancers, the complex E5/PDGFβR/subunit D could have an important role in perturbing proteostasis network as well as organelle and cytosol homeostasis. It is worthwhile noting that in bovine urothelial tumors we detected an overexpression of some of the most important markers of proteostasis stress such as heat shock proteins (HSPs) [32]. The latter are known to act as molecular chaperones to restore protein homeostasis [33,34]. Furthermore, we found an overexpression of the co-chaperone BAG3 (Bcl-2 associated athanogene 3), which depends on an altered degradation of the protein rather than the upregulation of gene transcription [35]. It is worth remembering that BAG3 protein degradation occurs via proteasome system only.

Cytosolic pH has been identified as a novel regulator that mediates the formation of proteasome storage granule (PSGs) and other protein aggregates. The regulation of proper partitioning of the proteasome into PSGs is essential for maintaining the correct level of the proteasome in the cytosol. It has been shown that the impaired ability of V-ATPase to regulate intracellular pH affects the kinetics of the PSG formation [30].

In our cases, the impairment of the vacuolar pump induced by E5 oncoprotein can be responsible for a proteasomal dysfunction resulting in a reduced clearance of specific protein such as proteasome-degraded BAG3 protein, known to be involved in a plethora of biological processes including the key role in mitigating

the proteotoxicity via selective autophagy [36]. It has been shown that autophagy is activated when the proteasome function is reduced, thus constituting a strong functional link between autophagy and proteasome systems [37]. Our findings are consistent with several *in vitro* studies showing that the impairment of V-ATPase can induce autophagic responses and increase the formation of autophagosomes thus the autophagy represents a mechanism to overcome alteration of pH homeostasis mediated by proton pump perturbation [38].

Finally, the selective autophagy occurring in bovine urothelial tumor cells transformed by E5 oncoprotein that we have been studying (Roperto, unpublished data) seems to strengthen this suggestion and the emerging concept that the molecular chaperones, the ubiquitin-proteasome system (UPS) and the autophagy machinery are central elements of the proteostasis network in which the V-ATPase proton pump is also involved.

## Acknowledgments

We are grateful to Dr M.S. Campo, Professor Emeritus, University of Glasgow, UK, for reading the manuscript; Dr L. Nasir, University of Glasgow, UK, for providing us the anti-BPV-2 E5 antibody and Dr A. Venuti, Istituto dei Tumori “Regina Elena”, Rome, for giving us the BPV-2 DNA plasmid.

## Author Contributions

Conceived and designed the experiments: SR VR FR. Performed the experiments: SR VR CU RL IE MGR MG DMC. Analyzed the data: SR CR GB FR. Wrote the paper: SR RG FR.

## References

- Meuten DJ (2002) Tumors of the urinary system. In Meuten, D.J. (Ed) Tumors in Domestic Animals, Blackwell Publishing Company, Iowa State Press, Ames, 524–546.
- Özkul IA, Aydin Y (1996) Tumours of the urinary bladder in cattle and water buffalo in the Black Sea region of Turkey. *Br Vet J* 152: 473–475.
- Pamukcu AM, Price JM, Bryan GT (1976) Naturally occurring and bracken fern-induced bovine urinary bladder tumors. Clinical and morphological characteristics. *Vet Pathol* 13: 110–122.
- Roperto S, Borzacchiello G, Brun R, Leonardi L, Maiolino P, et al. (2010a). A review of bovine urothelial tumours and tumour-like lesions of the urinary bladder. *J Comp Pathol* 142: 95–108.
- Evans IA, Mason J (1965) Carcinogenic activity of bracken. *Nature* 208: 913–914.
- Cairney M, Campo MS (1995) The synergism between bovine papillomavirus type 4 and quercetin is dependent on the timing of exposure. *Carcinogenesis* 16: 1997–2001.
- Campo MS (1997) Bovine papillomavirus and cancer. *Vet J* 154: 175–188.
- Borzacchiello G, Iovane G, Marcante ML, Poggiali F, Roperto F, et al. (2003) Presence of bovine papillomavirus type 2 and expression of the viral oncoprotein E5 in naturally occurring urinary bladder tumours in cows. *J Gen Virol* 84: 2921–2926.
- Campo MS, Jarrett WFH, Barron RJ, O’Neil BW, Smith KT (1992) Association of bovine papillomavirus type 2 and bracken fern with bladder cancer in cattle. *Cancer Res* 52: 6898–6904.
- Roperto S, Brun R, Paolini F, Urraro C, Russo V, et al. (2008) Detection of bovine papillomavirus type 2 (BPV-2) in the peripheral blood of cattle with urinary bladder tumours: possible biological role. *J Gen Virol* 89: 3027–3033.
- Wosiaki SR, Barreiros MAB, Alfieri AF, Alfieri AA (2005) Semi-nested PCR for detection and typing of bovine papillomavirus type 2 in urinary bladder and whole blood from cattle with enzootic haematuria. *J Virol Methods* 126: 215–219.
- Balcos LG, Borzacchiello G, Russo V, Popescu O, Roperto S, et al. (2008) Association of bovine papillomavirus type-2 and urinary bladder tumours in cattle from Romania. *Res Vet Sci* 85: 145–148.
- Borzacchiello G, Roperto F (2008) Bovine papillomaviruses, papillomas and cancer in cattle. *Vet Res* 39: 45–63.
- Maiolino P, Özkul A, Sepici-Dincel A, Roperto F, Yücel G, et al. (2013) Bovine papillomavirus type 2 infection and microscopic patterns of urothelial tumors of the urinary bladder in water buffaloes. *Biomed Res Int* 2013: 937918, doi: 10.1155/2013/937918.
- Martano M, Roperto F, de Cassia Stocco R, Russo V, Borzacchiello G, (2013) Bovine papillomavirus type 2 (BPV-2) infection and a series of mesenchymal tumors of the urinary bladder in cattle. *Biomed Res Int* 2013: 814635, doi: 10.1155/2013/814635.
- Resendes AR, Roperto S, Trapani F, Urraro C, Rodrigues A et al. (2011) Association of bovine papillomavirus type 2 (BPV-2) and urinary bladder tumours in cattle from the Azores archipelago. *Res Vet Sci* 90: 526–529.
- Roperto S, Comazzi S, Ciusani E, Paolini F, Borzacchiello G, et al. (2011) PBMCs are additional sites of productive infection of bovine papillomavirus type 2. *J Gen Virol* 92: 1787–1794.
- Roperto S, Russo V, Özkul A, Sepici-Dincel A, Maiolino P, et al. (2013a) Bovine papillomavirus type 2 infects the urinary bladder of water buffalo (*Bubalus bubalis*) and plays a crucial role in bubaline urothelial carcinogenesis. *J Gen Virol* 94: 403–408.
- Shafti-Keramat S, Schellenbacher C, Handisurya A, Christensen N, Reininger B, et al. (2009) Bovine papillomavirus type 1 (BPV1) and BPV2 are closely related serotypes. *Virology* 393:1–6.
- Conrad M, Bubb VJ, Schlegel R (1993) The human papillomavirus type 6 and 16 E5 proteins are membrane-associated proteins which associate with the 16-kilodalton pore-forming protein. *J Virol* 67: 6170–6178.
- Borzacchiello G, Russo V, Gentile F, Roperto F, Venuti A, et al. (2006) Bovine papillomavirus E5 oncoprotein binds to the activated form of the platelet-derived growth factor β receptor in naturally occurring bovine urinary bladder tumours. *Oncogene* 25: 1251–1260.
- Roperto S, De Tullio R, Raso C, Stifanese R, Russo V, et al. (2010b) Calpain 3 is expressed in a proteoliticly active form in papillomavirus-associated urothelial tumors of the urinary bladder in cattle. *PLoS One* 5, e10299.
- Andresson T, Sparkowski J, Goldstein DJ, Schlegel R. (1995) Vacuolar H<sup>+</sup> ATPase mutants transform cells and define a binding site for papillomavirus E5 oncoprotein. *J Biol Chem* 270, 6830–6837.
- Ashrafi GH, Tsirimonaki E, Marchetti BN, O’Brien PM, Sibbet GJ, et al (2002). Downregulation of MHC class I by bovine papillomavirus E5 oncoproteins. *Oncogene* 21, 248–259.
- Goldstein DJ, Schlegel R (1990) The E5 oncoprotein of bovine papillomavirus binds to a 16 kd cellular protein *EMBO J* 9: 137–146.
- Goldstein DJ, Andresson T, Sparkowski JJ, Schlegel R (1992) The BPV-1 E5 protein, the 16 kDa membrane pore-forming protein and the PDGF receptor exist in a complex that is dependent on hydrophobic transmembrane interactions. *EMBO J* 11: 4851–4859.
- Roperto S, Russo V, Özkul A, Corteggio A, Sepici-Dincel A, et al. (2013b) Productive infection of bovine papillomavirus type 2 in the urothelial cells of

- naturally occurring urinary bladder tumors in cattle and water buffaloes. *PLoS One* 8: e62227.
28. Suprynowicz FA, Campo MS, Schlegel R (2006) Biological activities of papillomavirus E5 proteins. In: Campo, M.S. (Ed.), *Papillomavirus Research – from natural history to vaccines and beyond*, Caister Academic Press, Norfolk, 97–113.
  29. Forgac M (2007) Vacuolar ATPases: rotary proton pumps in physiology and pathophysiology. *Nat Rev Mol Cell Biol* 8: 917–929.
  30. Peters LZ, Hazan R, Breker M, Schulcliner M, Ben-Aroya S (2013) Formation and dissociation of proteasome storage granules are regulated by cytosolic pH. *J Cell Biol* 201: 663–671.
  31. Saijo S, Aral S, Hossain KMM, Yamato I, Suzuki K, et al. (2011) Crystal structure of the central axis DF complex of the prokaryotic V-ATPase. *Proc Natl Acad Sci* 108: 19955–19960.
  32. Romanucci M, Malatesta D, Ciccarelli A, Bongiovanni L, Palmieri C, et al. (2012) Expression of heat shock proteins in premalignant and malignant urothelial lesions of bovine urinary bladder. *Cell Stress Chaperones* 17: 683–692.
  33. Hartl EU, Bracher A, Hayer-Hartl M (2011) Molecular chaperones in protein folding and proteostasis. *Nature* 475: 324–332.
  34. Powers EV, Balch WE (2013) Diversity in the origins of proteostasis networks – a driver for protein function in evolution. *Nat Rev Mol Cell Biol* 14: 237–248.
  35. Roperto S, Paciello O, Borzacchiello G, Esposito I, Riccardi M, et al. (2013c) Is Bag 3 protein involved in autophagic mechanisms in papillomavirus-associated urothelial tumors in cattle? *J Comp Pathol* 148: 49.
  36. Rapino F, Jung M, Fulda S (2013) BAG3 induction is required to mitigate proteotoxicity via selective autophagy following inhibition of constitutive protein degradation pathways. *Oncogene*, doi:10.1038/onc.2013.110.
  37. Ding WX, Ni HM, Gao W, Yoshimori T, Stolz DB, et al. (2007) Linking of autophagy to ubiquitin-proteasome system is important for the regulation of endoplasmic reticulum stress and cell viability. *Am J Pathol* 171: 513–524.
  38. Juhász G (2012) Interpretation of bafilomycin, pH neutralizing or protease inhibitor treatments in autophagy flux experiments. *Autophagy* 12: 1875–1876.
  39. Shevchenko A, Wilm M, Vorm O, Mann M (1996) Mass spectrometric sequencing of proteins silver-stained polyacrylamide gels. *Anal Chem* 68: 850–858.
